# Supplementary material for: Combinatorial transcription factor binding encodes cis-regulatory wiring of forebrain GABAergic neurogenesis
Source: PubMed Central journal article supplement — bioRxiv. 2023 Jun 28:2023.06.28.546894. Preprint. [Version 1] doi: 10.1101/2023.06.28.546894 (PMC10327028; doi:10.1101/2023.06.28.546894), 2023-06-28

## Supplementary Figure S4

### Summary of results for 84 pREs characterized here via transgenic mouse assays.

VISTA enhancer name (*mmXXXX*) is written in light blue to the left, below is internal enhancer name (*mJRXX*) as well as age of the stained and sectioned embryos. The success ratio is listed in dark blue to the right of the name (6/7 depicts 6 embryos with forebrain activity out of 7 embryos tested in total). Green and red bars show the normalized ChIP-seq signal of TFs in either BG (green, E13.5) or from cortex (CX, red, E12.5) TF ChIP-seq<sup>1</sup>. Darker color represents a stronger ChIP-Seq peak. The specific TF used in the ChIP-Seq experiments are shown at the top. Below each bar is a schema showing the tested enhancer location in light blue relative to the regulated gene, generally defined via H3K4me3 PLAC-seq interaction. The grey arrow depicts the orientation of target gene transcription. To the right of the gene schema is a wholemount (WM) of a representative of the *LacZ* expression, next to the WM are three sections of the specific WM shown. Only the WM are shown for pREs not having clearly reproducible *LacZ* activity in the forebrain. The pREs are listed based on their cluster number (bold numbers to the left, i.e., 1\_D first, 2\_D second, etc.) and within each cluster number the enhancers are sorted by activity: exclusively subpallium first (light green bar to the right), subpallium+pallium second (purple bar to the right), and exclusively pallium last (dark pink bar to the right). pREs marked with an \* were not included in further studies due to a positive rate below 30%. *mm1199*, *mm1276*, *mm1422*, *mm1423*, *mm1437*, *mm1787*, *mm1788*, *mm1804*, *mm1814*, *mm1816*, *mm1819* are published in <sup>1</sup>; *mm1196* is published in <sup>2</sup>; *mm1203* is published in <sup>3</sup>; *mm1428* and *mm1429* are published in <sup>4</sup>. Full transgenic enhancer assay results available at <https://enhancer.lbl.gov>.

1. Ypsilanti, A. R. *et al.* Transcriptional network orchestrating regional patterning of cortical progenitors. *Proc. Natl. Acad. Sci.* **118**, e2024795118 (2021).
2. Pla, R. *et al.* Dlx1 and Dlx2 Promote Interneuron GABA Synthesis, Synaptogenesis, and Dendritogenesis. *Cereb. Cortex* **28**, 3797–3815 (2018).
3. Lindtner, S. *et al.* Genomic Resolution of DLX-Orchestrated Transcriptional Circuits Driving Development of Forebrain GABAergic Neurons. *Cell Rep.* **28**, 2048-2063.e8 (2019).
4. Sandberg, M. *et al.* Transcriptional Networks Controlled by NKX2-1 in the Development of Forebrain GABAergic Neurons. *Neuron* **91**, 1260–1275 (2016).

1\_D

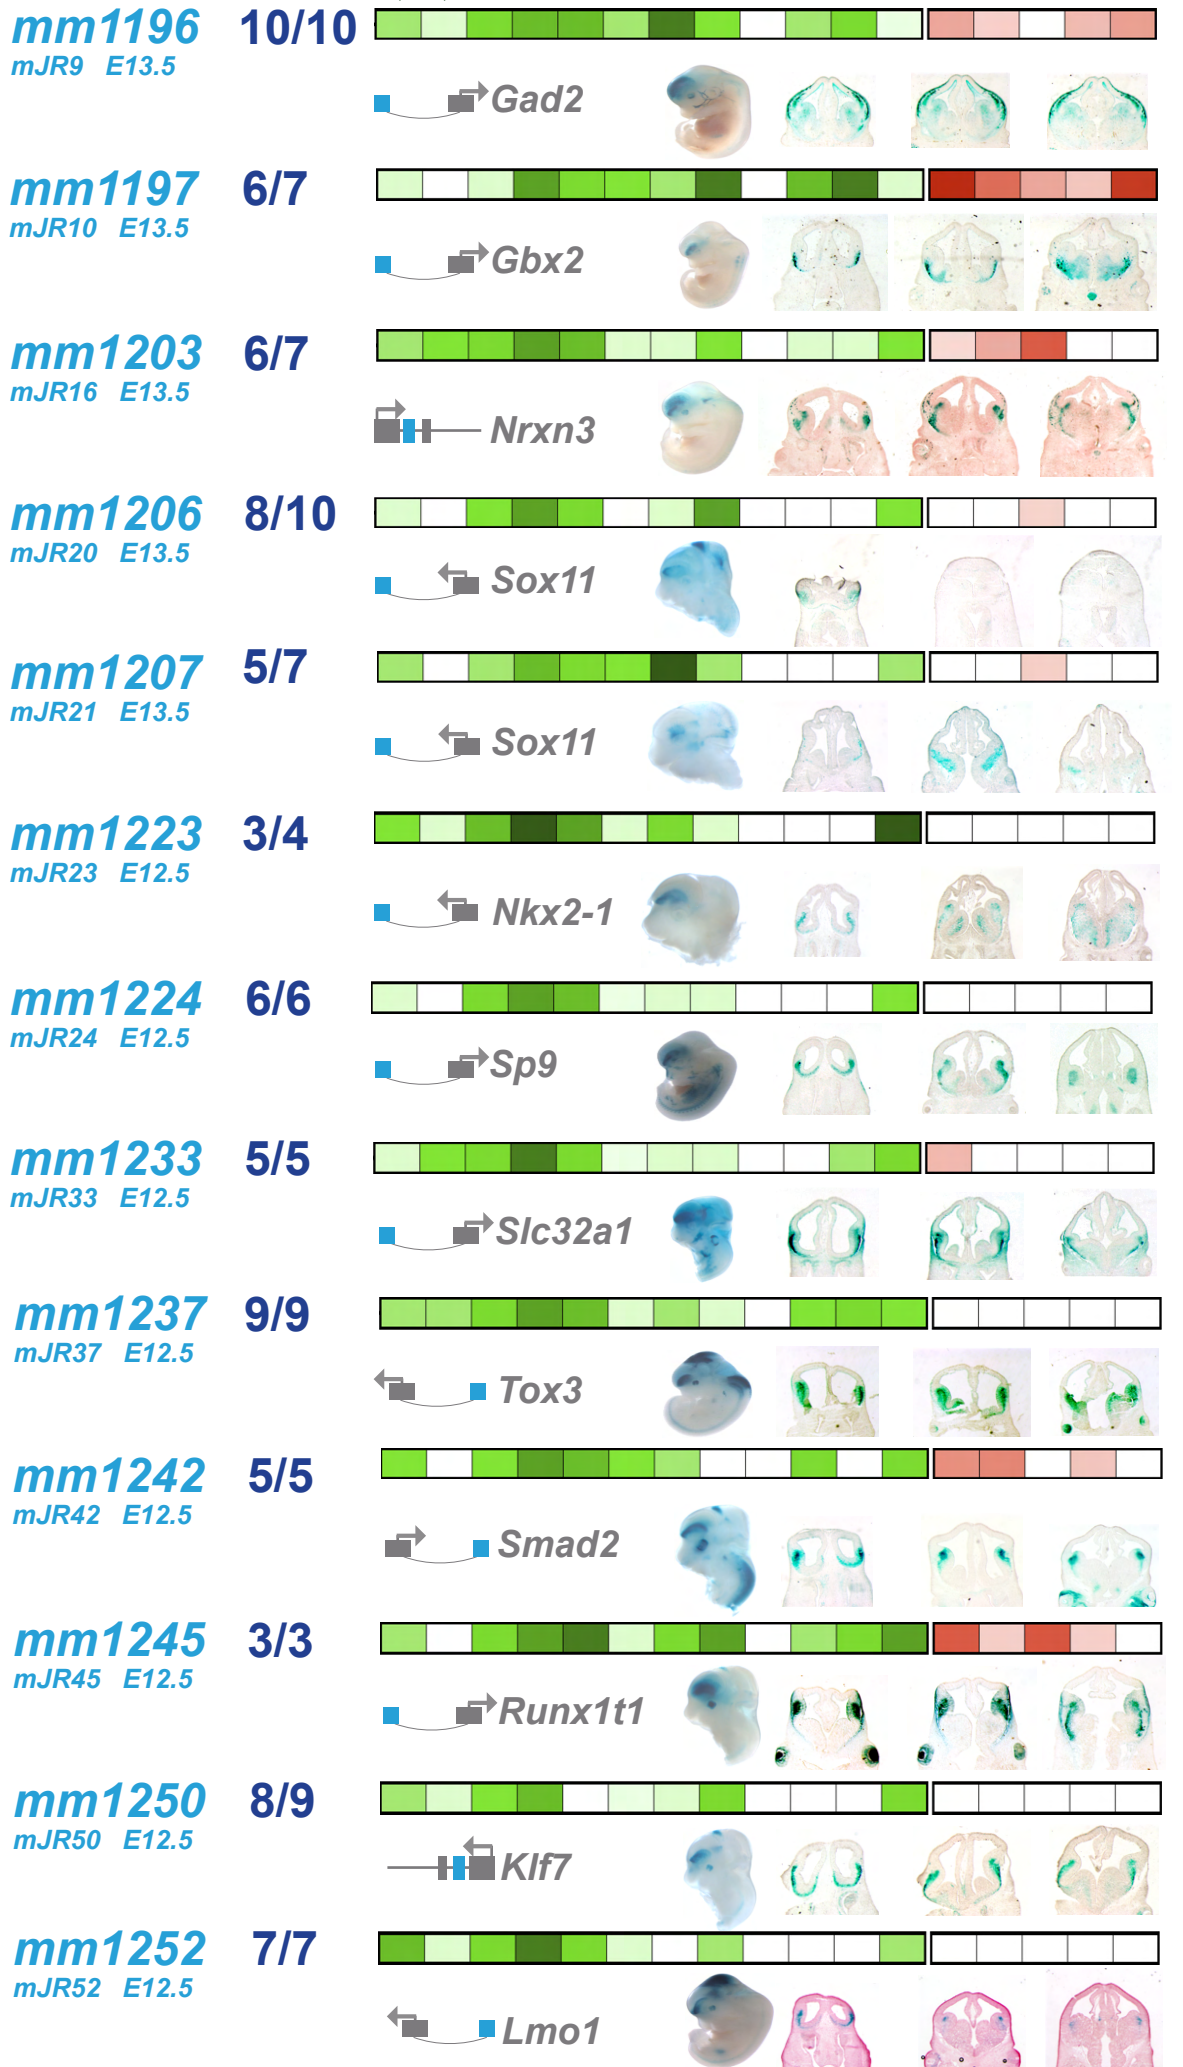

Subpallium

1\_D

**mm1253** 3/3  
mJR53 E12.5

ARX ASCL1 DLX1 DLX2 DLX5 GSX2 LHX6 NKX2-1 NR2F1 OTX2 PBX1 SP9 EMX2 LHX2 NR2F1 PAX6 PBX1

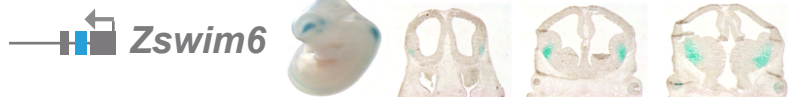

**mm1257** 4/10  
mJR57 E12.5

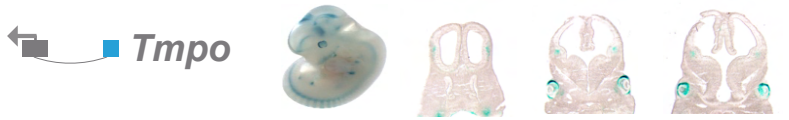

**mm1262** 3/4  
mJR62 E12.5

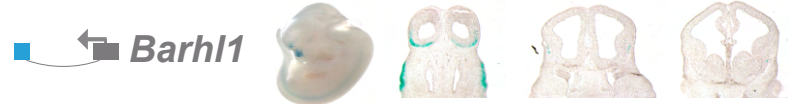

**mm1263** 8/9  
mJR63 E12.5

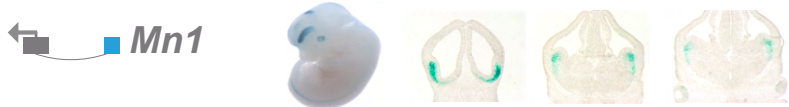

**mm1266** 5/5  
mJR66 E12.5

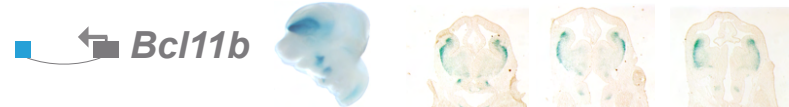

**mm1272** 3/6  
mJR72 E12.5

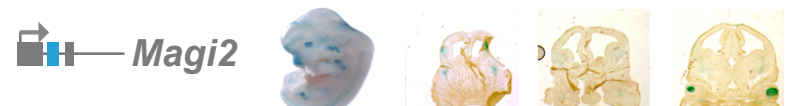

**mm1428** 3/3  
mJR122 E12.5

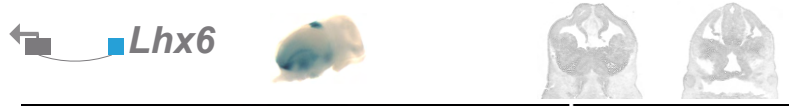

**mm1793** 3/3  
mJR128 E12.5

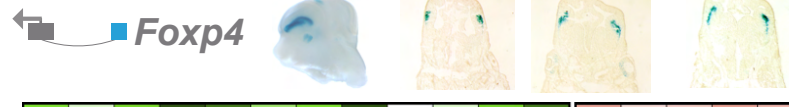

**mm1816** 5/8  
mJR115 E12.5

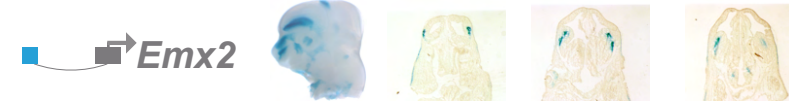

**mm1198** 2/5  
mJR11 E13.5

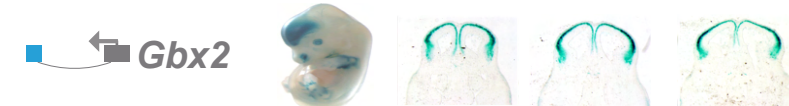

**mm1200** 7/8  
mJR13 E13.5

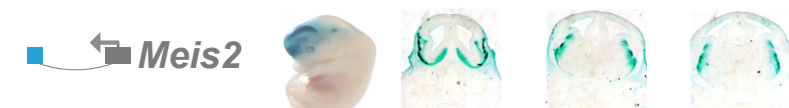

**mm1202** 2/3  
mJR15 E13.5

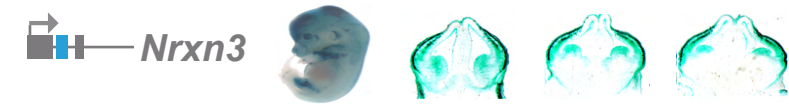

**mm1230** 2/5  
mJR30 E12.5

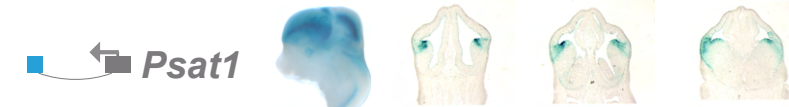

Subpallium

Subpallium + Pallium



1\_D

**mm1234** 3/3  
mJR34 E12.5

ARX ASCL1 DLX1 DLX2 DLX5 GSX2 LHX6 NKX2-1 NR2F1 OTX2 PBX1 SP9 **EMX2** **LHX2** **NR2F1** **PAX6** **PBX1**

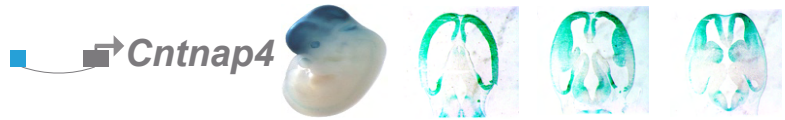

**mm1264\*** 2/12  
mJR64 E12.5

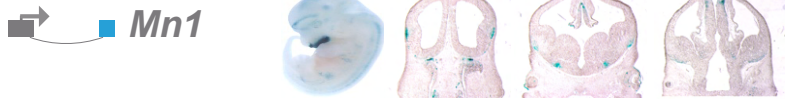

**mm1273** 4/5  
mJR73 E12.5

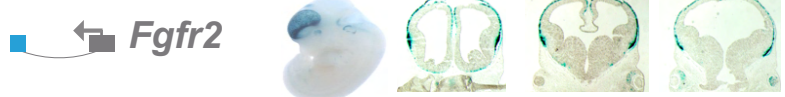

**mm1788** 5/6  
mJR91 E12.5

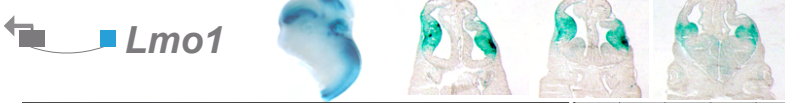

**mm1801\*** 2/10  
mJR136 E12.5

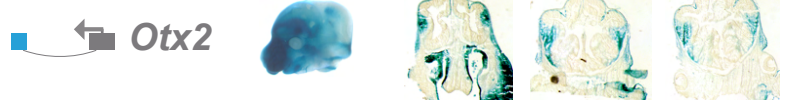

**mm1208** 13/13  
mJR22 E13.5

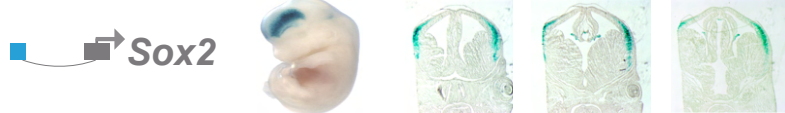

**mm1244** 5/5  
mJR44 E12.5

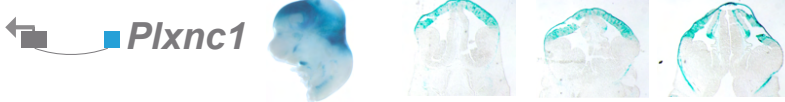

**mm1256** 4/5  
mJR56 E12.5

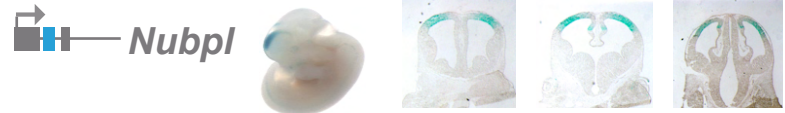

**mm1226** 5/8  
mJR26 E12.5

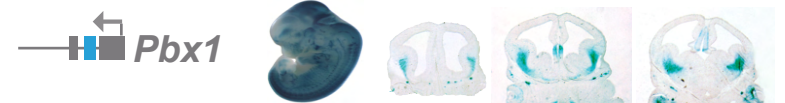

**mm1249** 4/5  
mJR49 E12.5

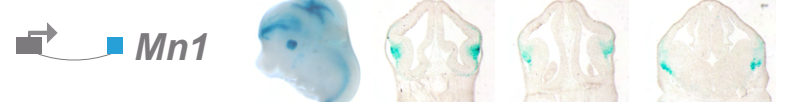

**mm1422** 4/12  
mJR104 E12.5

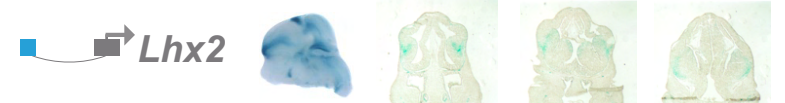

**mm1429** 15/15  
mJR123 E12.5

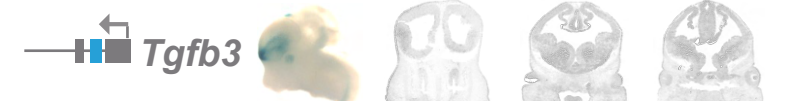

2\_D

Subpallium + Pallium

Pallium

Subpallium

2D

**mm1795** 4/6  
mJR130 E12.5

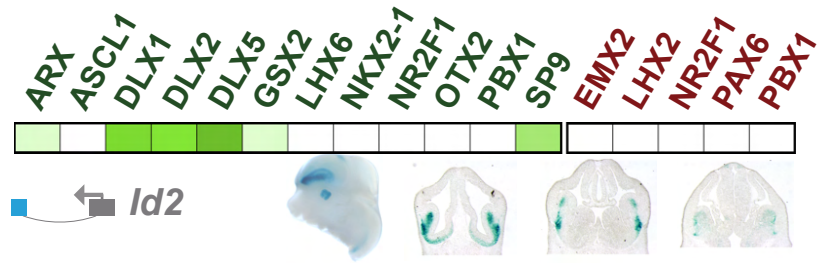

**mm1796** 1/3  
mJR131 E12.5

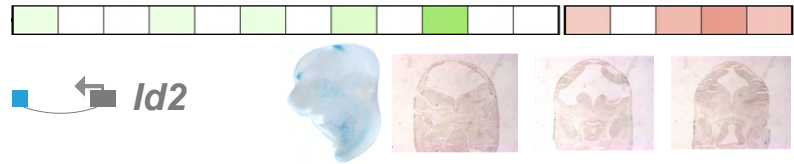

**mm1239** 7/11  
mJR39 E12.5

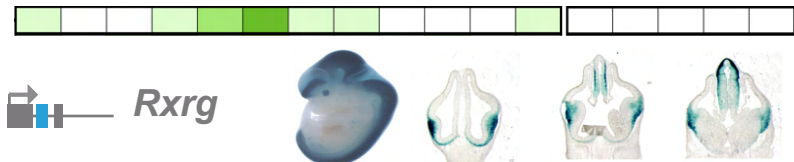

**mm1275** 7/8  
mJR75 E12.5

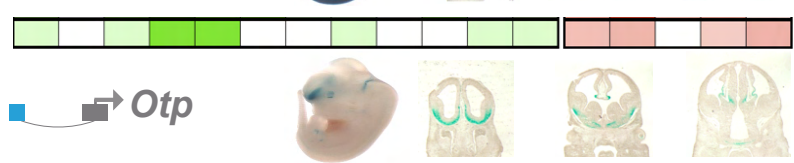

**mm1276** 6/6  
mJR76 E12.5

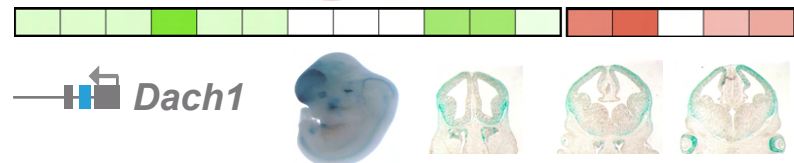

**mm1804** 3/6  
mJR140 E12.5

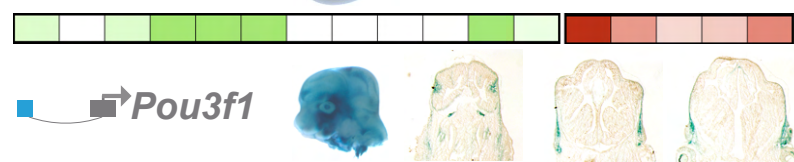

**mm1280** 5/5  
mJR80 E12.5

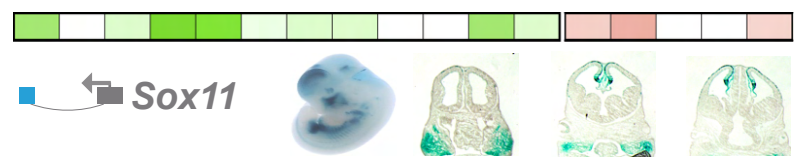

**mm1193** 7/12  
mJR6 E11.5

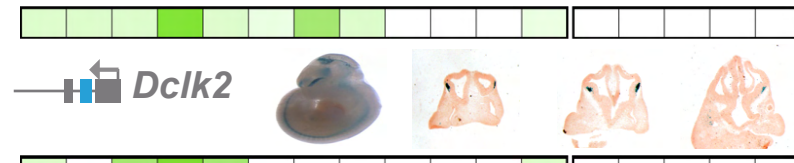

**mm1227** 4/10  
mJR27 E12.5

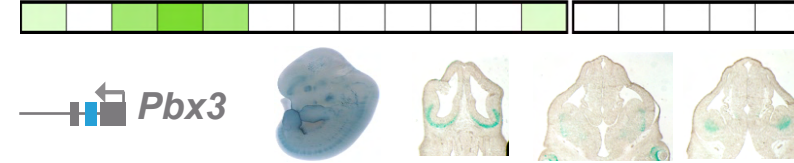

**mm1805** 2/6  
mJR141 E12.5

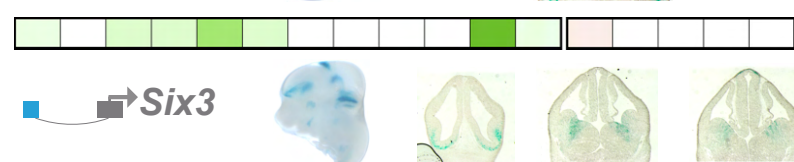

**mm1228** 3/7  
mJR28 E12.5

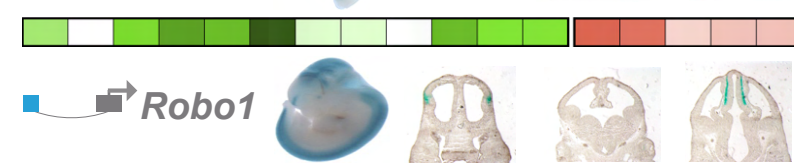

**mm1815** 4/12  
mJR112 E12.5

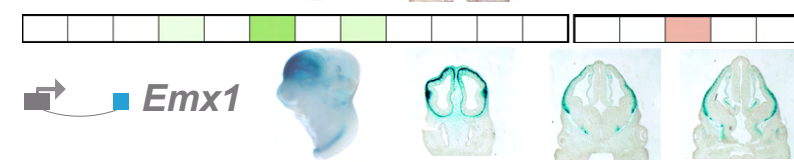

**mm1790\*** 1/7  
mJR97 E12.5

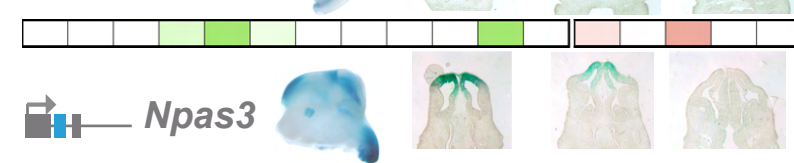

Suppallium

Subpallium + Pallium

Pallium

Subpallium

Subpallium + Pallium

Pallium

3D

4\_D

9\_D

4\_D + 15\_D

2\_P

**mm1240** 4/6

mJR40 E12.5

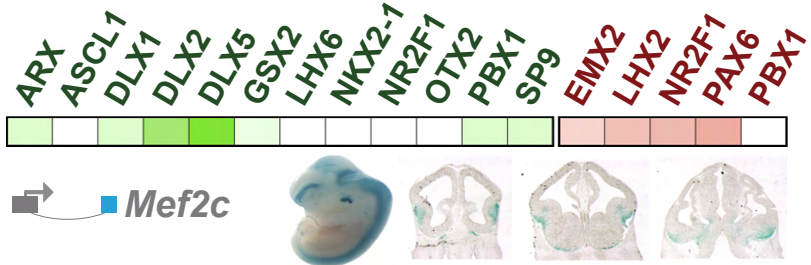

Subpallium

**mm1281** 4/5

mJR81 E12.5

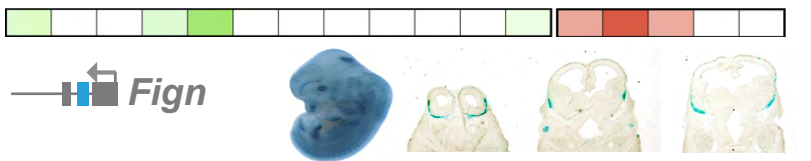

Subpallium + Pallium

**mm1803** 1/3

mJR139 E12.5

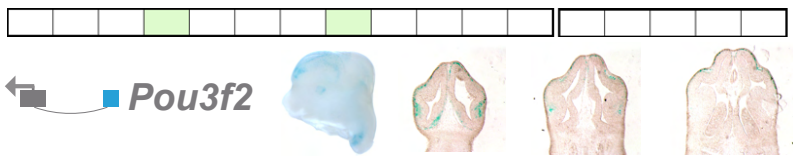

Subpallium + Pallium

**mm1787** 4/4

mJR90 E12.5

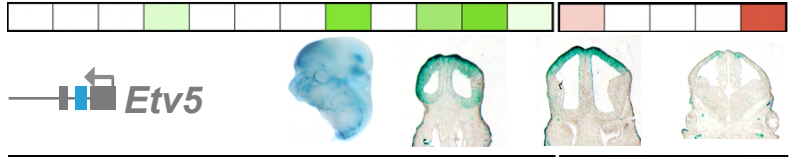

Subpallium + Pallium

**mm1820\*** 2/7

mJR120 E12.5

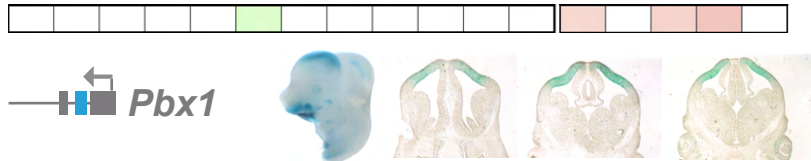

Pallium

**mm1794\*** 1/8

mJR129 E12.5

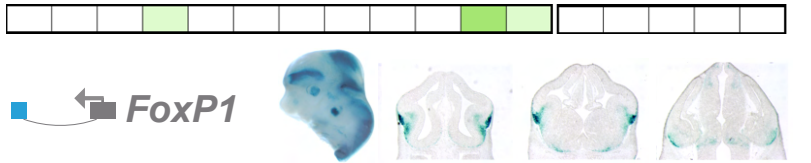

Subpallium + Pallium

**mm1205\*** 2/10

mJR18 E13.5

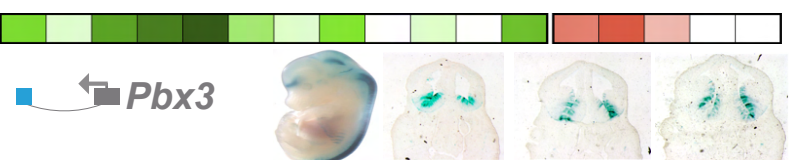

Subpallium

**mm1235\*** 1/9

mJR35 E12.5

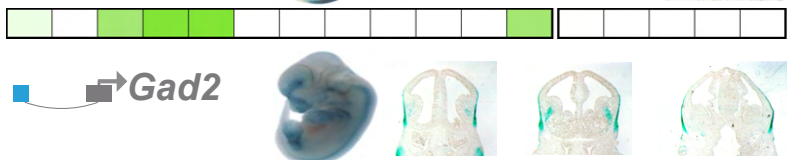

Subpallium

**mm1199** 7/8

mJR12 E13.5

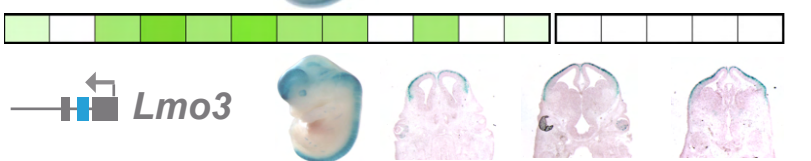

Subpallium + Pallium

**mm1809** 3/5

mJR87 E12.5

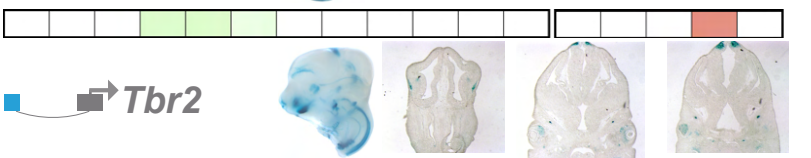

Subpallium + Pallium

ARX ASCL1 DLX1 DLX2 DLX5 GSX2 LHX6 NKX2-1 NR2F1 OTX2 PBX1 SP9 EMX2 LHX2 NR2F1 PAX6 PBX1



1\_D

**mm1191**

mJR04 E11.5

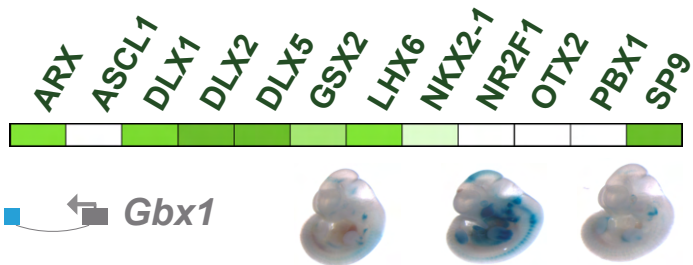**mm1194**

mJR07 E11.5

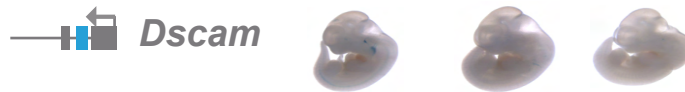**mm1225**

mJR25 E12.5

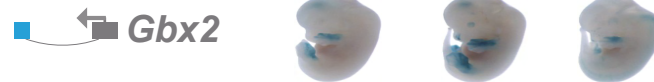**mm1255**

mJR55 E12.5

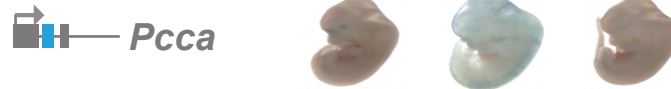**mm1260**

mJR60 E12.5

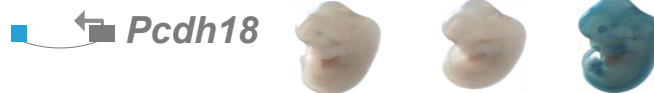**mm1261**

mJR61 E12.5

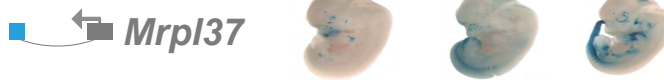**mm1270**

mJR70 E12.5

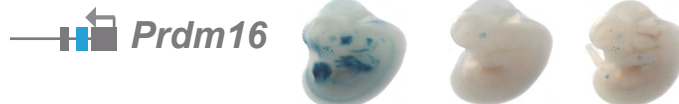**mm1806**

mJR83 E12.5

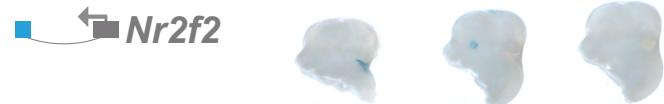**mm1241**

mJR41 E12.5

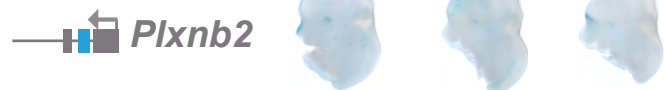**mm1271**

mJR71 E12.5

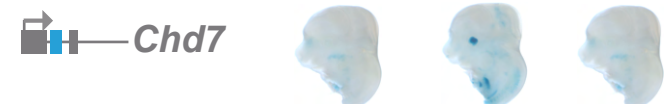**mm1274**

mJR74 E12.5

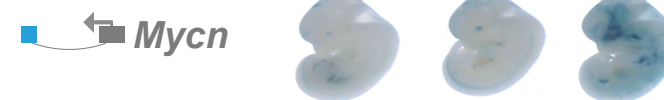**mm1279**

mJR79 E12.5

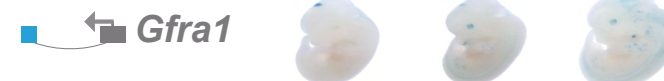**mm1437**

mJR110 E12.5

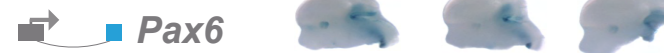

2\_D

2\_D

**mm1792**  
mJR127 E12.5

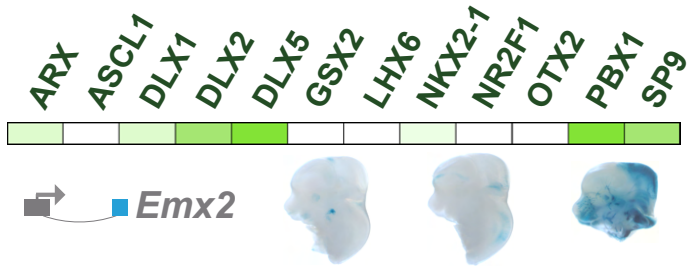

**mm1799**  
mJR134 E12.5

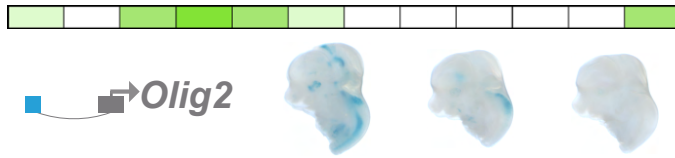

**mm1800**  
mJR135 E12.5

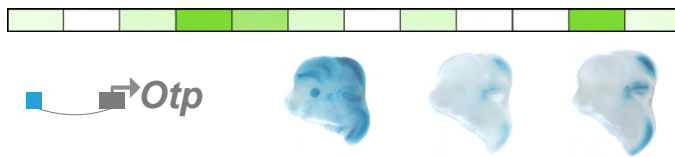

3\_D

**mm1423**  
mJR109 E12.5

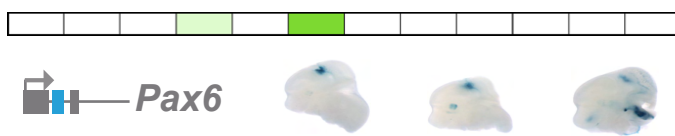

**mm1756**  
mJR114 E12.5

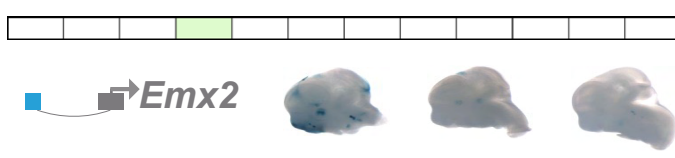

**mm1814**  
mJR107 E12.5

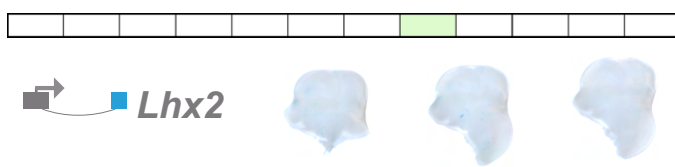

7\_D

**mm1802**  
mJR138 E12.5

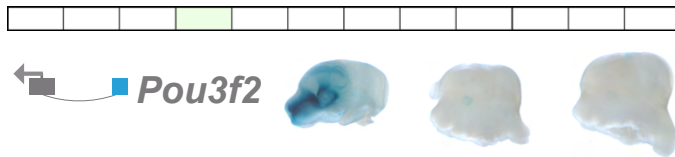

**mm1808**  
mJR86 E12.5

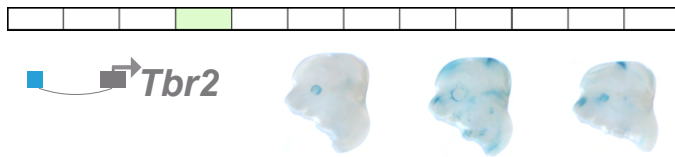

9\_D

**mm1819**  
mJR119 E12.5

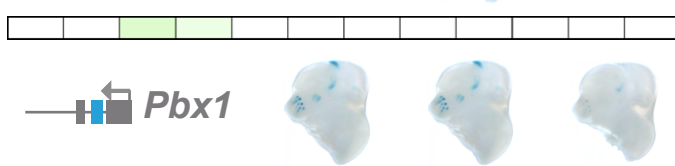

16\_D

**mm1791**  
mJR126 E12.5

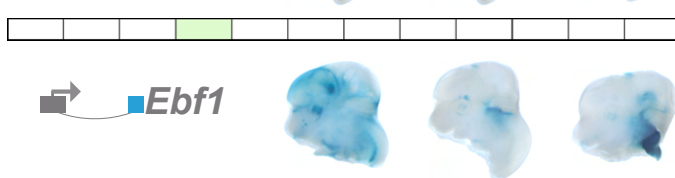

Supplement: media-4.pdf [file media-4.pdf]
