# Supplementary material for: Combinatorial transcription factor binding encodes cis-regulatory wiring of forebrain GABAergic neurogenesis
Source: PubMed Central journal article supplement — bioRxiv. 2023 Jun 28:2023.06.28.546894. Preprint. [Version 1] doi: 10.1101/2023.06.28.546894 (PMC10327028; doi:10.1101/2023.06.28.546894), 2023-06-28

## Supplementary Figure S2

**Combinatorial TF binding assignment for pREs at the *Arx* locus and primary TF motif by cluster. (a)** *Arx* locus on the X chromosome showing TF ChIP-seq signal and cluster assignment. Region shows intermixing of pREs with different combinatorial binding patterns, as well as enrichment of broadly-bound pREs. Also shown are six regions previous tested in the VISTA enhancer database (<https://enhancer.lbl.gov>). 4/6 tested regions showed enhancer activity in E11.5 mouse forebrain. **(b)** Average motif positional coverage plots 300 bp in each direction from locus center for core TF motifs by pRE cluster. Scaled by row for comparable relative motif positional distribution within clusters. Comparison of positional motif enrichment (here) with proportional motif occurrence (Figure 2f) enables discernment of strong centered primary binding (motif presence with central positional tendency), dispersed but still putative primary DNA binding (motif presence, no central positional tendency), or indirect interaction (no motif presence, no central positional tendency).

**a**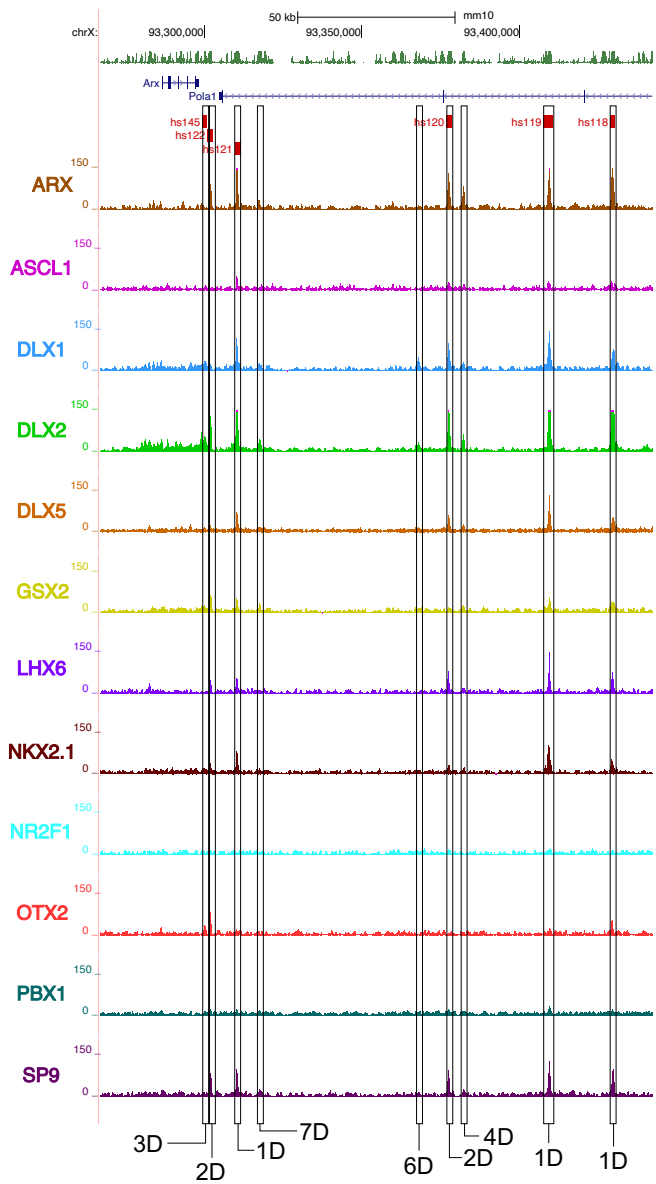**b**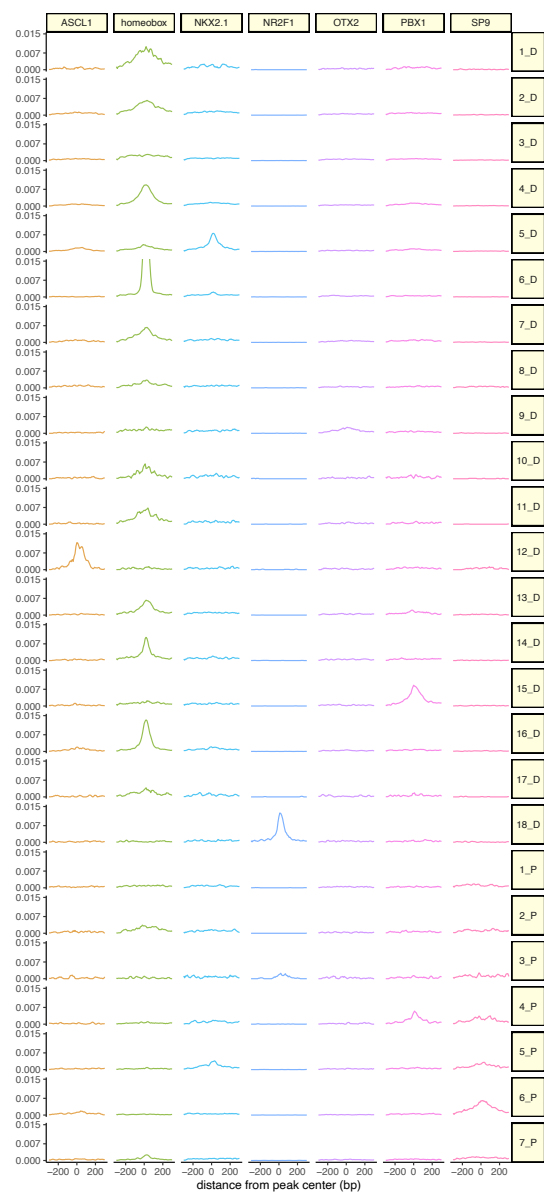

Supplement: media-2.pdf [file media-2.pdf]
